# Supplementary material for: Efficient air-stable perovskite solar cells with a (FAI)0.46(MAI)0.40(MABr)0.14(PbI2)0.86(PbBr2)0.14 active layer fabricated via a vacuum flash-assisted method under RH > 50%
Source: PubMed Central journal article supplement — RSC Adv. 2019 Apr 1;9(18):10148–54. doi: 10.1039/c9ra01625b (PMC9062358; doi:10.1039/c9ra01625b), 2019-04-01
Supplement: RA-009-C9RA01625B-s001.pdf [file RA-009-C9RA01625B-s001.pdf]

## Supporting Information

### Efficient Air-Stable Perovskite Solar Cells with (FAI)<sub>0.46</sub>(MAI)<sub>0.40</sub>(MABr)<sub>0.14</sub>(PbI<sub>2</sub>)<sub>0.86</sub>(PbBr<sub>2</sub>)<sub>0.14</sub> Active Layer Fabricated via Vacuum Flash-assisted Method under RH>50%

Li Chen,<sup>a,b</sup> Hui Cao,<sup>a\*</sup> Shurong Wang,<sup>a</sup> Yuxing Luo,<sup>b</sup> Tao Tao,<sup>a</sup> Jingwei Sun<sup>a</sup> and  
Mingdao Zhang<sup>a\*</sup>

<sup>a.</sup> *Monitoring and Pollution Control, Collaborative Innovation Center of Atmospheric Environment and Equipment Technology, School of Chemistry and Materials, Nanjing University of Information Science & Technology, Nanjing 210044, Jiangsu, PR China. E-mail: yccaoh@hotmail.com; matchlessjimmy@163.com*

<sup>b.</sup> *Institute of Functional Nano & Soft Materials, Soochow University, Soochow 215123, P.R. China.*

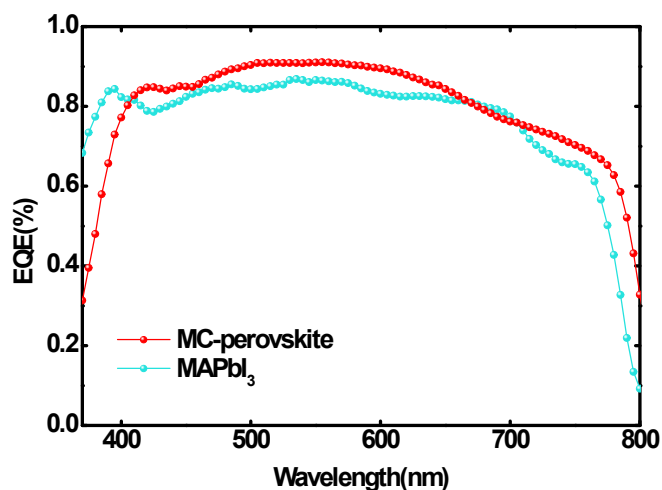

Figure S1. IPCE (EQE) of MAPbI<sub>3</sub> and MC-perovskite.
